# Supplementary material for: RBM25 binds to and regulates alternative splicing levels of Slc38a9, Csf1, and Coro6 to affect immune and inflammatory processes in H9c2 cells
Source: PeerJ journal article supplement (doi:10.7717/peerj.16312), 2023-11-07
Supplement: Abbreviation.docx [file Abbreviation.docx]

| *Lnc215* | long non-coding RNA 215 |
| --- | --- |
| *Irf7* | interferon regulatory factor 7 |
| *Cxcl10* | C-X-C motif chemokine ligand 10 |
| *Oas1b* | 2'-5' oligoadenylate synthetase 1b |
| *Irgm2* | immunity-related GTPase family M member 2 |
| *Mx2* | MX dynamin-like GTPase 2 |
| *Ifi47* | interferon-gamma inducible protein 47 |
| *Ifit1* | interferon-gamma inducible protein 1 |
| *Oas1a* | 2'-5' oligoadenylate synthetase 1a |
| *Ifit3* | interferon-gamma inducible protein 1 |
| *Dhx58* | Dexh-box helicase 58 |
| *Slc38a9* | solute carrier family 38 member 9 |
| *Csf1* | colony-stimulating factor 1 |
| *Il17rc* | interleukin 17 receptor C |
| *Coro6* | coronin 6 |
| *Brd8* | bromodomain containing 8 |
