# Supplementary material for: RBM25 binds to and regulates alternative splicing levels of Slc38a9, Csf1, and Coro6 to affect immune and inflammatory processes in H9c2 cells
Source: PeerJ journal article supplement (doi:10.7717/peerj.16312), 2023-11-07
Supplement: R_software_code.zip [file R_software_code.zip]

suppressPackageStartupMessages(library("optparse"))

suppressPackageStartupMessages(library("stats"))

option_list <- list(

make_option(c("-f", "--file"),action = "store",type = "character",

help = "The Input file"),

make_option(c("-t","--type"),action = "store",type = "character",

help = "heatmap type:

exp

exp_norowname

exp_nox

exp_nox_log2

exp_noxy

exp_noscale

exp_noscale_nox

exp_noscale_noy

exp_noscale_noxy

exp_noscale_noxy_norowname

exp_noscale_noxy_log2

exp_colscale

exp_colscale_nox

exp_colscale_noy

exp_colscale_noxy

exp_noscale_norowname

exp_noscale_nox_norowname

exp_nox_norowname

exp_nox_norowname_log2

exp_noy_norowname

exp_noy_norowname_log2

exp_noxy_norowname

exp_noxy_norowname_log2

samplecor

samplecor_half_upper

samplecor_half_lower

kmeans

kmeans_nox

"),

make_option(c("-c","--colorstyle"),action = "store",type = "character",default="A",

help = "colorstyle:

A :default

C :blackandred

B :big red

"),

make_option(c("-b","--start"),action = "store",type = "integer",default = 1,

help = "appoint the column of start ; default = 1"),

make_option(c("-e","--end"),action = "store",type = "integer",default = -1,

help = "appoint the column of end; default = -1"),

make_option(c("-x", "--xanno"),action = "store",type = "character",default = "",

help = "The Anno file for X"),

make_option(c("-y", "--yanno"),action = "store",type = "character",default = "",

help = "The Anno file for Y"),

make_option(c("-w","--width"),action = "store",type = "integer",default = 5,

help = "width; default = 5"),

make_option(c("-g","--height"),action = "store",type = "integer",default = 8,

help = "heigth; default = 8"),

make_option(c("-n","--filename"),action = "store",type = "character",default="DEG_heatmap",

help = "The filename of the picture ; default = DEG_heatmap"),

make_option(c("-o", "--outdir"),action = "store",type = "character",default = "./",

help = "The outdir;default = ./")

)

opt <- parse_args(OptionParser(option_list = option_list))

start <- as.numeric(opt$start)

end <- as.numeric(opt$end)

w <- as.numeric(opt$width)

h <- as.numeric(opt$height)

library(pheatmap)

library("RColorBrewer")

library("corrplot")

NO_REUSE = F

# # get the filename to use later

filename <- strsplit(opt$file,"/")[[1]]

filename <- filename[length(filename)]

filename <- sub('.txt','',filename)

# # try to reuse earlier-loaded data if possible

# print('Reading matrix file.')

primary_data = read.table(opt$file, header=T, com='',quote = "", sep="\t", row.names=1, check.names=F)

# primary_data = read.table("Sample_correlation.dat", header=T, com='', sep="\t", row.names=1, check.names=F)

annotation_col = data.frame(

s = factor(rep(c("s"), length(colnames(primary_data))))

)

rownames(annotation_col) = colnames(primary_data)

if(opt$xanno!=""){

annotation_col = read.table(opt$xanno, header=T, com='', sep="\t", row.names=1, check.names=F)

}

annotation_row = data.frame(

s = factor(rep(c("s"), length(rownames(primary_data))))

)

rownames(annotation_row) = rownames(primary_data)

if(opt$yanno!=""){

annotation_row = read.table(opt$yanno, header=T, com='', sep="\t", row.names=1, check.names=F)

}

if(end> 0){

primary_data <- primary_data[,start:end]

}

primary_data = as.matrix(primary_data)

data = primary_data

scaleyellowred <- colorRampPalette(c("#08519c","#3182bd","#ffffff","#e6550d","#a63603"),space = "rgb")(500)

if (opt$colorstyle == "B"){

scaleyellowred <- colorRampPalette(c("#08519c","#08519c","#3182bd","#3182bd","#ffffff","#e6550d","#e6550d","#a63603","#a63603"),space = "rgb")(500)

}

if (opt$colorstyle == "C"){

scaleyellowred <- colorRampPalette(c("green","green","black","red","red"),space = "rgb")(500)

}

if (opt$colorstyle == "D"){

scaleyellowred <- colorRampPalette(c("navy", "white", "firebrick3"))(50)

}

annotation_colors <- c("#0072B2","#eb5d46","#F0E442","#009E73","#CC79A7","#5d8ac4","#f39659","#936355","#999999","#E69F00","#56B4E9","#009E73","#F0E442","#0072B2","#D55E00","#000000","#E69F00","#56B4E9","#D55E00","#CC79A7","#FCFBFD","#EFEDF5","#DADAEB","#BCBDDC","#9E9AC8","#807DBA","#6A51A3","#54278F","#3F007D")

# scaleyellowred <- colorRampPalette(c("green","black","red"),bias=1)(256)

# scaleyellowred <- colorRampPalette(rev(brewer.pal(n = 7, name = "RdYlBu")))(100)

## row anno and col anno

if (opt$type == "kmeans_nox"){

pheatmap(data,annotation_col = annotation_col, annotation_row = annotation_row,color=scaleyellowred, kmeans_k=4, clustering_method = "complete", clustering_distance_rows="euclidean",cluster_cols=F,scale="row",show_rownames = F,fontsize=15, cellwidth = 15,cellheight = 15,border_color=NA, angle_col = "45",width=opt$width,height=opt$height,filename = paste(opt$filename,".png",sep=''))

pheatmap(data,annotation_col = annotation_col, annotation_row = annotation_row,color=scaleyellowred, kmeans_k=4, clustering_method = "complete", clustering_distance_rows="euclidean",cluster_cols=F,scale="row",show_rownames = F,fontsize=15, cellwidth = 15,cellheight = 15,border_color=NA, angle_col = "45",width=opt$width,height=opt$height,filename = paste(opt$filename,".pdf",sep=''))

if (opt$type == "exp"){

data <- data[rowSums(data) != 0,]

pheatmap(data,annotation_col = annotation_col, annotation_row = annotation_row,color=scaleyellowred, clustering_method = "complete", clustering_distance_rows="euclidean",clustering_distance_cols="euclidean",scale="row",show_rownames = T,border_color=NA, angle_col = "45",width=opt$width,height=opt$height,filename = paste(opt$filename,".png",sep='')) pheatmap(data,annotation_col = annotation_col, annotation_row = annotation_row,color=scaleyellowred, clustering_method = "complete", clustering_distance_rows="euclidean",clustering_distance_cols="euclidean",scale="row",show_rownames = T,border_color=NA, angle_col = "45",width=opt$width,height=opt$height,filename = paste(opt$filename,".pdf",sep=''))}

if (opt$type == "exp_colscale"){

data <- data[rowSums(data) != 0,]

data <- data[,colSums(data) != 0]

pheatmap(data,annotation_col = annotation_col, annotation_row = annotation_row,color=scaleyellowred, clustering_method = "complete", clustering_distance_rows="euclidean",clustering_distance_cols="euclidean",scale="column",show_rownames = T,border_color=NA, angle_col = "45",width=opt$width,height=opt$height,filename = paste(opt$filename,".png",sep='')) pheatmap(data,annotation_col = annotation_col, annotation_row = annotation_row,color=scaleyellowred, clustering_method = "complete", clustering_distance_rows="euclidean",clustering_distance_cols="euclidean",scale="column",show_rownames = T,border_color=NA, angle_col = "45",width=opt$width,height=opt$height,filename = paste(opt$filename,".pdf",sep=''))}

if (opt$type == "exp_colscale_nox"){

data <- data[rowSums(data) != 0,]

data <- data[,colSums(data) != 0]

pheatmap(data,annotation_col = annotation_col, annotation_row = annotation_row,color=scaleyellowred, clustering_method = "complete", clustering_distance_rows="euclidean",cluster_cols=F,scale="column",show_rownames = T,border_color=NA, angle_col = "45",width=opt$width,height=opt$height,filename = paste(opt$filename,".png",sep=''))

pheatmap(data,annotation_col = annotation_col, annotation_row = annotation_row,color=scaleyellowred, clustering_method = "complete", clustering_distance_rows="euclidean",cluster_cols=F,scale="column",show_rownames = T,border_color=NA, angle_col = "45",width=opt$width,height=opt$height,filename = paste(opt$filename,".pdf",sep=''))}

if (opt$type == "exp_colscale_noy"){

data <- data[rowSums(data) != 0,]

data <- data[,colSums(data) != 0]

pheatmap(data,annotation_col = annotation_col, annotation_row = annotation_row,color=scaleyellowred, clustering_method = "complete", clustering_distance_cols="euclidean",cluster_rows=F,scale="column",show_rownames = T,border_color=NA, angle_col = "45",width=opt$width,height=opt$height,filename = paste(opt$filename,".png",sep=''))

pheatmap(data,annotation_col = annotation_col, annotation_row = annotation_row,color=scaleyellowred, clustering_method = "complete", clustering_distance_cols="euclidean",cluster_rows=F,scale="column",show_rownames = T,border_color=NA, angle_col = "45",width=opt$width,height=opt$height,filename = paste(opt$filename,".pdf",sep='')) }

if (opt$type == "exp_colscale_noxy"){

data <- data[rowSums(data) != 0,]

data <- data[,colSums(data) != 0]

pheatmap(data,annotation_col = annotation_col, annotation_row = annotation_row,color=scaleyellowred, clustering_method = "complete", cluster_cols=F,cluster_rows=F,scale="column",show_rownames = T,border_color=NA, angle_col = "45",width=opt$width,height=opt$height,filename = paste(opt$filename,".png",sep='') pheatmap(data,annotation_col = annotation_col, annotation_row = annotation_row,color=scaleyellowred, clustering_method = "complete", cluster_cols=F,cluster_rows=F,scale="column",show_rownames = T,border_color=NA, angle_col = "45",width=opt$width,height=opt$height,filename = paste(opt$filename,".pdf",sep='')) }

if (opt$type == "exp_norowname"){

data <- data[rowSums(data) != 0,]

pheatmap(data,annotation_col = annotation_col, annotation_row = annotation_row,color=scaleyellowred, clustering_method = "complete", clustering_distance_rows="euclidean",clustering_distance_cols="euclidean",scale="row",show_rownames = F,border_color=NA, angle_col = "45",width=opt$width,height=opt$height,filename = paste(opt$filename,".png",sep='')) pheatmap(data,annotation_col = annotation_col, annotation_row = annotation_row,color=scaleyellowred, clustering_method = "complete", clustering_distance_rows="euclidean",clustering_distance_cols="euclidean",scale="row",show_rownames = F,border_color=NA, angle_col = "45",width=opt$width,height=opt$height,filename = paste(opt$filename,".pdf",sep=''))}

if (opt$type == "exp_noscale"){

data <- data[rowSums(data) != 0,]

pheatmap(data,annotation_col = annotation_col, annotation_row = annotation_row,color=scaleyellowred, clustering_method = "complete", clustering_distance_rows="euclidean",clustering_distance_cols="euclidean",scale="none",show_rownames = T,border_color=NA, angle_col = "45",width=opt$width,height=opt$height,filename = paste(opt$filename,".png",sep='')) pheatmap(data,annotation_col = annotation_col, annotation_row = annotation_row,color=scaleyellowred, clustering_method = "complete", clustering_distance_rows="euclidean",clustering_distance_cols="euclidean",scale="none",show_rownames = T,border_color=NA, angle_col = "45",width=opt$width,height=opt$height,filename = paste(opt$filename,".pdf",sep='')) }

if (opt$type == "exp_noscale_nox_norowname"){

data <- data[rowSums(data) != 0,]

data <- data[,colSums(data) != 0]

pheatmap(data,annotation_col = annotation_col, annotation_row = annotation_row,color=scaleyellowred, clustering_method = "complete", clustering_distance_rows="euclidean",cluster_cols=F,scale="none",show_rownames = F,border_color=NA, angle_col = "45",width=opt$width,height=opt$height,filename = paste(opt$filename,".png",sep=''))

pheatmap(data,annotation_col = annotation_col, annotation_row = annotation_row,color=scaleyellowred, clustering_method = "complete", clustering_distance_rows="euclidean",cluster_cols=F,scale="none",show_rownames = F,border_color=NA, angle_col = "45",width=opt$width,height=opt$height,filename = paste(opt$filename,".pdf",sep='')) }

if (opt$type == "exp_noscale_nox"){

data <- data[rowSums(data) != 0,]

data <- data[,colSums(data) != 0]

pheatmap(data,annotation_col = annotation_col, annotation_row = annotation_row,color=scaleyellowred, clustering_method = "complete", clustering_distance_rows="euclidean",cluster_cols=F,scale="none",show_rownames = T,border_color=NA, angle_col = "45",width=opt$width,height=opt$height,filename = paste(opt$filename,".png",sep='')) pheatmap(data,annotation_col = annotation_col, annotation_row = annotation_row,color=scaleyellowred, clustering_method = "complete", clustering_distance_rows="euclidean",cluster_cols=F,scale="none",show_rownames = T,border_color=NA, angle_col = "45",width=opt$width,height=opt$height,filename = paste(opt$filename,".pdf",sep='')) }

if (opt$type == "exp_noscale_noy"){

data <- data[rowSums(data) != 0,]

data <- data[,colSums(data) != 0]

pheatmap(data,annotation_col = annotation_col, annotation_row = annotation_row,color=scaleyellowred, clustering_method = "complete", clustering_distance_cols="euclidean",cluster_rows=F,scale="none",show_rownames = T,border_color=NA, angle_col = "45",width=opt$width,height=opt$height,filename = paste(opt$filename,".png",sep=''))

pheatmap(data,annotation_col = annotation_col, annotation_row = annotation_row,color=scaleyellowred, clustering_method = "complete", clustering_distance_cols="euclidean",cluster_rows=F,scale="none",show_rownames = T,border_color=NA, angle_col = "45",width=opt$width,height=opt$height,filename = paste(opt$filename,".pdf",sep='')) }

if (opt$type == "exp_noscale_noxy"){

data <- data[rowSums(data) != 0,]

data <- data[,colSums(data) != 0]

pheatmap(data,annotation_col = annotation_col, annotation_row = annotation_row,color=scaleyellowred, clustering_method = "complete", cluster_cols=F,cluster_rows=F,scale="none",show_rownames = T,border_color=NA, angle_col = "45",width=opt$width,height=opt$height,filename = paste(opt$filename,".png",sep=''))

pheatmap(data,annotation_col = annotation_col, annotation_row = annotation_row,color=scaleyellowred, clustering_method = "complete", cluster_cols=F,cluster_rows=F,scale="none",show_rownames = T,border_color=NA, angle_col = "45",width=opt$width,height=opt$height,filename = paste(opt$filename,".pdf",sep='')) }

if (opt$type == "exp_noscale_noxy_log2"){

data <- data[rowSums(data) != 0,]

data <- data[,colSums(data) != 0]

data = log2(data+1)

pheatmap(data,annotation_col = annotation_col, annotation_row = annotation_row,color=scaleyellowred, clustering_method = "complete", cluster_cols=F,cluster_rows=F,scale="none",show_rownames = T,border_color=NA, angle_col = "45",width=opt$width,height=opt$height,filename = paste(opt$filename,".png",sep=''))

pheatmap(data,annotation_col = annotation_col, annotation_row = annotation_row,color=scaleyellowred, clustering_method = "complete", cluster_cols=F,cluster_rows=F,scale="none",show_rownames = T,border_color=NA, angle_col = "45",width=opt$width,height=opt$height,filename = paste(opt$filename,".pdf",sep='')) }

if (opt$type == "exp_noscale_noxy_norowname"){

data <- data[rowSums(data) != 0,]

data <- data[,colSums(data) != 0]

pheatmap(data,annotation_col = annotation_col, annotation_row = annotation_row,color=scaleyellowred, clustering_method = "complete", cluster_cols=F,cluster_rows=F,scale="none",show_rownames = F,border_color=NA, angle_col = "45",width=opt$width,height=opt$height,filename = paste(opt$filename,".png",sep=''))

pheatmap(data,annotation_col = annotation_col, annotation_row = annotation_row,color=scaleyellowred, clustering_method = "complete", cluster_cols=F,cluster_rows=F,scale="none",show_rownames = F,border_color=NA, angle_col = "45",width=opt$width,height=opt$height,filename = paste(opt$filename,".pdf",sep=''))

}

if (opt$type == "exp_noscale_norowname"){

data <- data[rowSums(data) != 0,]

pheatmap(data,annotation_col = annotation_col, annotation_row = annotation_row,color=scaleyellowred, clustering_method = "complete", clustering_distance_rows="euclidean",clustering_distance_cols="euclidean",scale="none",show_rownames = F,border_color=NA, angle_col = "45",width=opt$width,height=opt$height,filename = paste(opt$filename,".png",sep='')) pheatmap(data,annotation_col = annotation_col, annotation_row = annotation_row,color=scaleyellowred, clustering_method = "complete", clustering_distance_rows="euclidean",clustering_distance_cols="euclidean",scale="none",show_rownames = F,border_color=NA, angle_col = "45",width=opt$width,height=opt$height,filename = paste(opt$filename,".pdf",sep='')) }

if (opt$type == "exp_log2"){

data <- data[rowSums(data) != 0,]

data = log2(data+1)

pheatmap(data,annotation_col = annotation_col, annotation_row = annotation_row,color=scaleyellowred, clustering_method = "complete", clustering_distance_rows="euclidean",clustering_distance_cols="euclidean",scale="row",show_rownames = T,border_color=NA, angle_col = "45",width=opt$width,height=opt$height,filename = paste(opt$filename,".png",sep='')) pheatmap(data,annotation_col = annotation_col, annotation_row = annotation_row,color=scaleyellowred, clustering_method = "complete", clustering_distance_rows="euclidean",clustering_distance_cols="euclidean",scale="row",show_rownames = T,border_color=NA, angle_col = "45",width=opt$width,height=opt$height,filename = paste(opt$filename,".pdf",sep=''))

if (opt$type == "exp_nox"){

data <- data[rowSums(data) != 0,]

pheatmap(data,annotation_col = annotation_col, annotation_row = annotation_row,color=scaleyellowred, clustering_method = "complete", clustering_distance_rows="euclidean",cluster_cols=F,scale="row",show_rownames = T,border_color=NA, angle_col = "45",width=opt$width,height=opt$height,filename = paste(opt$filename,".png",sep=''))

pheatmap(data,annotation_col = annotation_col, annotation_row = annotation_row,color=scaleyellowred, clustering_method = "complete", clustering_distance_rows="euclidean",cluster_cols=F,scale="row",show_rownames = T,border_color=NA, angle_col = "45",width=opt$width,height=opt$height,filename = paste(opt$filename,".pdf",sep='')) }

if (opt$type == "exp_nox_log2"){

data <- data[rowSums(data) != 0,]

data = log2(data+1)

pheatmap(data,annotation_col = annotation_col, annotation_row = annotation_row,color=scaleyellowred, clustering_method = "complete", clustering_distance_rows="euclidean",cluster_cols=F,scale="row",show_rownames = T,border_color=NA, angle_col = "45",width=opt$width,height=opt$height,filename = paste(opt$filename,".png",sep=''))

pheatmap(data,annotation_col = annotation_col, annotation_row = annotation_row,color=scaleyellowred, clustering_method = "complete", clustering_distance_rows="euclidean",cluster_cols=F,scale="row",show_rownames = T,border_color=NA, angle_col = "45",width=opt$width,height=opt$height,filename = paste(opt$filename,".pdf",sep=''))}

if (opt$type == "exp_noxy"){

pheatmap(data,annotation_col = annotation_col, annotation_row = annotation_row,color=scaleyellowred, clustering_method = "complete", clustering_distance_rows="euclidean",cluster_rows=F,cluster_cols=F,scale="row",show_rownames = T,border_color=NA, angle_col = "45",width=opt$width,height=opt$height,filename = paste(opt$filename,".png",sep='')) pheatmap(data,annotation_col = annotation_col, annotation_row = annotation_row,color=scaleyellowred, clustering_method = "complete", clustering_distance_rows="euclidean",cluster_rows=F,cluster_cols=F,scale="row",show_rownames = T,border_color=NA, angle_col = "45",width=opt$width,height=opt$height,filename = paste(opt$filename,".pdf",sep='')) }

if (opt$type == "exp_noy_norowname"){

data <- data[rowSums(data) != 0,]

pheatmap(data,annotation_col = annotation_col, annotation_row = annotation_row,color=scaleyellowred, clustering_method = "complete", clustering_distance_cols="euclidean",cluster_rows=F,scale="row",show_rownames = F,border_color=NA, angle_col = "45",width=opt$width,height=opt$height,filename = paste(opt$filename,".png",sep='')) #

pheatmap(data,annotation_col = annotation_col, annotation_row = annotation_row,color=scaleyellowred, clustering_method = "complete", clustering_distance_cols="euclidean",cluster_rows=F,scale="row",show_rownames = F,border_color=NA, angle_col = "45",width=opt$width,height=opt$height,filename = paste(opt$filename,".pdf",sep='')) }

if (opt$type == "exp_noy_norowname_log2"){

data <- data[rowSums(data) != 0,]

data = log2(data+1)

pheatmap(data,annotation_col = annotation_col, annotation_row = annotation_row,color=scaleyellowred, clustering_method = "complete", clustering_distance_cols="euclidean",cluster_rows=F,scale="row",show_rownames = F,border_color=NA, angle_col = "45",width=opt$width,height=opt$height,filename = paste(opt$filename,".png",sep=''))

pheatmap(data,annotation_col = annotation_col, annotation_row = annotation_row,color=scaleyellowred, clustering_method = "complete", clustering_distance_cols="euclidean",cluster_rows=F,scale="row",show_rownames = F,border_color=NA, angle_col = "45",width=opt$width,height=opt$height,filename = paste(opt$filename,".pdf",sep='')) }

if (opt$type == "exp_nox_norowname"){

data <- data[rowSums(data) != 0,]

pheatmap(data,annotation_col = annotation_col, annotation_row = annotation_row,color=scaleyellowred, clustering_method = "complete", clustering_distance_rows="euclidean",cluster_cols=F,scale="row",show_rownames = F,border_color=NA, angle_col = "45",width=opt$width,height=opt$height,filename = paste(opt$filename,".png",sep=''))

pheatmap(data,annotation_col = annotation_col, annotation_row = annotation_row,color=scaleyellowred, clustering_method = "complete", clustering_distance_rows="euclidean",cluster_cols=F,scale="row",show_rownames = F,border_color=NA, angle_col = "45",width=opt$width,height=opt$height,filename = paste(opt$filename,".pdf",sep='')) }

if (opt$type == "exp_nox_norowname_log2"){

data <- data[rowSums(data) != 0,]

data = log2(data+1)

pheatmap(data,annotation_col = annotation_col, annotation_row = annotation_row,color=scaleyellowred, clustering_method = "complete", clustering_distance_rows="euclidean",cluster_cols=F,scale="row",show_rownames = F,border_color=NA, angle_col = "45",width=opt$width,height=opt$height,filename = paste(opt$filename,".png",sep=''))

pheatmap(data,annotation_col = annotation_col, annotation_row = annotation_row,color=scaleyellowred, clustering_method = "complete", clustering_distance_rows="euclidean",cluster_cols=F,scale="row",show_rownames = F,border_color=NA, angle_col = "45",width=opt$width,height=opt$height,filename = paste(opt$filename,".pdf",sep=''))

}

if (opt$type == "exp_nox_log2"){

data <- data[rowSums(data) != 0,]

data = log2(data+1)

pheatmap(data,annotation_col = annotation_col, annotation_row = annotation_row,color=scaleyellowred, clustering_method = "complete", clustering_distance_rows="euclidean",cluster_cols=F,scale="row",show_rownames = T,border_color=NA, angle_col = "45",width=opt$width,height=opt$height,filename = paste(opt$filename,".png",sep=''))

pheatmap(data,annotation_col = annotation_col, annotation_row = annotation_row,color=scaleyellowred, clustering_method = "complete", clustering_distance_rows="euclidean",cluster_cols=F,scale="row",show_rownames = T,border_color=NA, angle_col = "45",width=opt$width,height=opt$height,filename = paste(opt$filename,".pdf",sep='')) }

if (opt$type == "exp_noxy_norowname"){

pheatmap(data,annotation_col = annotation_col, annotation_row = annotation_row,color=scaleyellowred, clustering_method = "complete", clustering_distance_rows="euclidean",cluster_rows=F,cluster_cols=F,scale="row",show_rownames = F,border_color=NA, angle_col = "45",width=opt$width,height=opt$height,filename = paste(opt$filename,".png",sep='')) pheatmap(data,annotation_col = annotation_col, annotation_row = annotation_row,color=scaleyellowred, clustering_method = "complete", clustering_distance_rows="euclidean",cluster_rows=F,cluster_cols=F,scale="row",show_rownames = F,border_color=NA, angle_col = "45",width=opt$width,height=opt$height,filename = paste(opt$filename,".pdf",sep='')) }

if (opt$type == "exp_noxy_norowname_log2"){

data = log2(data+1)

pheatmap(data,annotation_col = annotation_col, annotation_row = annotation_row,color=scaleyellowred, clustering_method = "complete", clustering_distance_rows="euclidean",cluster_rows=F,cluster_cols=F,scale="row",show_rownames = F,border_color=NA, angle_col = "45",width=opt$width,height=opt$height,filename = paste(opt$filename,".png",sep='')) pheatmap(data,annotation_col = annotation_col, annotation_row = annotation_row,color=scaleyellowred, clustering_method = "complete", clustering_distance_rows="euclidean",cluster_rows=F,cluster_cols=F,scale="row",show_rownames = F,border_color=NA, angle_col = "45",width=opt$width,height=opt$height,filename = paste(opt$filename,".pdf",sep=''))

if (opt$type == "samplecor"){

sample_cor = cor(data, method='pearson', use='pairwise.complete.obs')

cat(c('Gene\t'),file=paste(opt$filename,".xls",sep=''))

write.table(sample_cor, file=paste(opt$filename,".xls",sep=''), quote=F, append=T, sep='\t')

data <- sample_cor

o = rownames(data)

sample_dist = dist(t(primary_data), method='euclidean')

hc = hclust(sample_dist, method='complete')

data = data[hc$order, hc$order]

data = data[o, o]

data

rowcount <- nrow(data)

if (rowcount>7){

pheatmap(data, annotation_col = annotation_col, annotation_row = annotation_row,cluster_col = hc, cluster_row = hc,border_color="white",show_colnames=T,cellwidth = 15, cellheight = 15, fontsize=15,width=opt$width,height=opt$height,filename = paste(opt$filename,".pdf",sep=''),display_numbers = FALSE)

pheatmap(data, annotation_col = annotation_col, annotation_row = annotation_row,cluster_col = hc, cluster_row = hc,border_color="white",show_colnames=T,cellwidth = 15, cellheight = 15, fontsize=15,width=opt$width,height=opt$height,filename = paste(opt$filename,".png",sep=''),display_numbers = FALSE)

}

if (rowcount<=7){

pheatmap(data, annotation_col = annotation_col, annotation_row = annotation_row,cluster_col = hc, cluster_row = hc,border_color="white",show_colnames=T,fontsize=20,filename = paste(opt$filename,".pdf",sep=''),display_numbers = FALSE,width = 8, height = 7)

pheatmap(data, annotation_col = annotation_col, annotation_row = annotation_row,cluster_col = hc, cluster_row = hc,border_color="white",show_colnames=T,fontsize=20,filename = paste(opt$filename,".png",sep=''),display_numbers = FALSE,width = 8, height = 7)

}

}

if (opt$type == "samplecor_half_upper"){

sample_cor = cor(data, method='pearson', use='pairwise.complete.obs')

cat(c('Gene\t'),file=paste(opt$filename,".xls",sep=''))

write.table(sample_cor, file=paste(opt$filename,".xls",sep=''), quote=F, append=T, sep='\t')

data <- sample_cor

o = rownames(data)

sample_dist = dist(t(data), method='euclidean')

hc = hclust(sample_dist, method='complete')

# hc = hclust(as.dist(1 - data))

data = data[hc$order, hc$order]

data[upper.tri(data)] = NA

data = data[o, o]

data

rowcount <- nrow(data)

if (rowcount>7){

pheatmap(data, annotation_col = annotation_col, annotation_row = annotation_row,cluster_col = hc, cluster_row = hc,border_color="white",show_colnames=T,cellwidth = 15, cellheight = 15, fontsize=15,width=opt$width,filename = paste(opt$filename,".pdf",sep=''),display_numbers = FALSE)

pheatmap(data, cluster_col = hc, cluster_row = hc,border_color="white",show_colnames=T,cellwidth = 15, cellheight = 15, fontsize=15,width=opt$width,filename = paste(opt$filename,".png",sep=''),display_numbers = FALSE)

}

if (rowcount<=7){

pheatmap(data, annotation_col = annotation_col, annotation_row = annotation_row,cluster_col = hc, cluster_row = hc,border_color="white",show_colnames=T,fontsize=20,filename = paste(opt$filename,".pdf",sep=''),display_numbers = FALSE,width = 8, height = 7)

pheatmap(data, cluster_col = hc, cluster_row = hc,border_color="white",show_colnames=T,fontsize=20,filename = paste(opt$filename,".png",sep=''),display_numbers = FALSE,width = 8, height = 7)

}

}

if (opt$type == "samplecor_half_lower"){

sample_cor = cor(data, method='pearson', use='pairwise.complete.obs')

cat(c('Gene\t'),file=paste(opt$filename,".xls",sep=''))

write.table(sample_cor, file=paste(opt$filename,".xls",sep=''), quote=F, append=T, sep='\t')

data <- sample_cor

o = rownames(data)

sample_dist = dist(t(data), method='euclidean')

hc = hclust(sample_dist, method='complete')

# hc = hclust(as.dist(1 - data))

data = data[hc$order, hc$order]

data[lower.tri(data)] = NA

data = data[o, o]

data

rowcount <- nrow(data)

if (rowcount>7){

pheatmap(data, annotation_col = annotation_col, annotation_row = annotation_row,cluster_col = hc, cluster_row = hc,border_color="white",show_colnames=T,cellwidth = 15, cellheight = 15, fontsize=15,width=opt$width,filename = paste(opt$filename,".pdf",sep=''),display_numbers = FALSE)

pheatmap(data, cluster_col = hc, cluster_row = hc,border_color="white",show_colnames=T,cellwidth = 15, cellheight = 15, fontsize=15,width=opt$width,filename = paste(opt$filename,".png",sep=''),display_numbers = FALSE)

}

if (rowcount<=7){

pheatmap(data, annotation_col = annotation_col, annotation_row = annotation_row,cluster_col = hc, cluster_row = hc,border_color="white",show_colnames=T,fontsize=20,filename = paste(opt$filename,".pdf",sep=''),display_numbers = FALSE,width = 8, height = 7)

pheatmap(data, cluster_col = hc, cluster_row = hc,border_color="white",show_colnames=T,fontsize=20,filename = paste(opt$filename,".png",sep=''),display_numbers = FALSE,width = 8, height = 7)

}

}
