# Supplementary figures and images for: RBM25 binds to and regulates alternative splicing levels of Slc38a9, Csf1, and Coro6 to affect immune and inflammatory processes in H9c2 cells
Source: PeerJ journal article supplement (doi:10.7717/peerj.16312), 2023-11-07

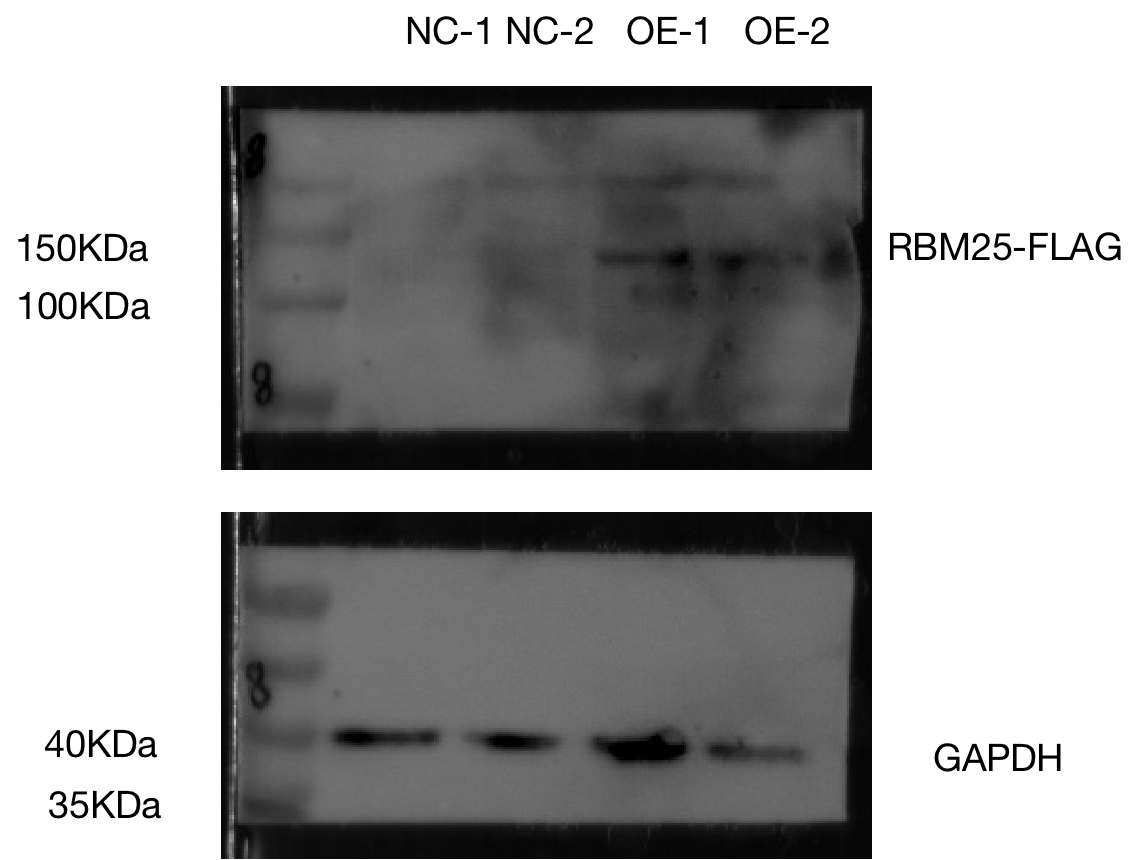

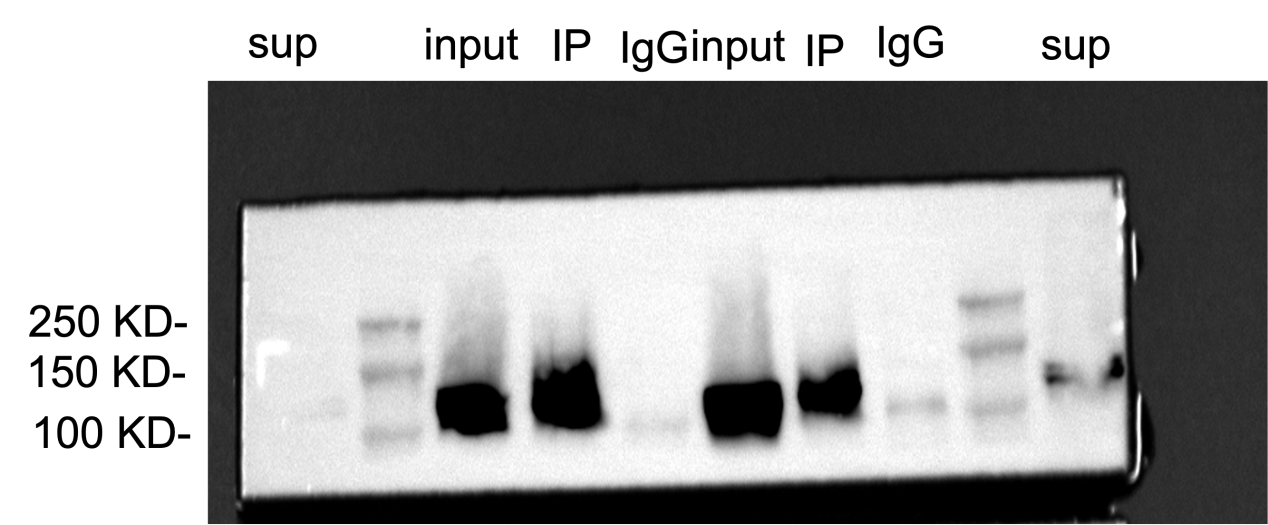


Ctrl_1 Ctrl_2 OE_1 OE_2

Supplement: wb.docx [file wb.docx]
